# Supplementary material for: How do general practitioners access guidelines and utilise electronic medical records to make clinical decisions on antibiotic use? Results from an Australian qualitative study
Source: PubMed Central journal article supplement — BMJ Open. 2019 Aug 5;9(8):e028329. doi: 10.1136/bmjopen-2018-028329 (PMC6687052; doi:10.1136/bmjopen-2018-028329), 2019-08-05
Supplement: bmjopen-2018-028329supp001.pdf [file bmjopen-2018-028329supp001.pdf]

## Appendix 1: Interview schedule

**Question 1.** I would like to hear about how you use your electronic medical record to record and make decisions about antibiotic prescribing. Can you tell me about this?

Prompts:

- What type of electronic medical record do you use?
- Can you tell me how you record decisions about antibiotic prescribing in the record?
  - Do you record the reason for prescribing? How do you do that? If not, can you tell me why?
- Are there any tools within the record to help you when making decisions about what antibiotic to use and for what duration?
  - Does anyone use MIMS? What is your experience of using this tool?
- Have you used any other EMRs in the past that you have used in a different way?
  - What was helpful about that record? What were the barriers?

**Question 2.** I'd like to hear about the use of guidelines for making decisions about whether to prescribe or how to prescribe antibiotics in terms of type of antibiotic and duration of use. Can you tell me how about any that you use?

Prompt:

- What guidelines do you access, if any, when making decisions about antibiotic prescribing?
- Under what circumstances would you use a guideline for antibiotic prescribing?
- Can you tell me how you prefer to access guidelines?  
Electronically/books/internet/app
- Are there any limitations to:
  - accessing guidelines?
  - Using guidelines?
- Can you tell me anything about what might make you more likely to access or use a guideline?

**Question 3.** Now I'd like to focus on Therapeutic Guidelines – Antibiotic

Prompt:

- Can you tell me your experience of using TG- Antibiotic?
- Can give me any examples of how you use TG Antibiotic?
- If you don't use TG Antibiotic, can you tell me why? Can you think about any circumstances where you might want to use it?
- How would you prefer to access TG Antibiotic?
